# Supplementary material for: A novel STAT1 loss-of-function mutation associated with Mendelian susceptibility to mycobacterial disease
Source: Frontiers journal article supplement (doi:10.3389/fcimb.2022.1002140), 2022-10-21
Supplement: Table_1.XLS [file Table_1.XLS]

## Sheet: Sheet1
									mycobacterial disease													Treatments
ID	Kindred	References (PMID)	Age of onset	Gender	Consanguinity	Ethnicity	Genotype	Type of deficiency	MSMD	Disseminated	bone	lymph node	skin	lung	liver/spleen	CNS	pathogenic bacteria	other bacteria infection	virus infection	fungus infection	other situations	antibiotic	IFN-γ	rituximab/infliximab	HSCT	outcomes (age and post-transplant time at last FU)
P1	K1	Kagawa et al.,2017	3 y	female	－	Argentinean	c.469G>A, p.E157K	AD partial	isolated MSMD	Y		Y	Y			Y	M. bovis-BCG, M. avium					Anti-mycobacterium treatment (no details)				Alive
P2 (P1's father)	K1	Kagawa et al.,2017	infancy	male	－	Argentinean	c.469G>A, p.E157K	AD partial	isolated MSMD					Y			M. tuberculosis									Alive
P3	K2	Kagawa et al.,2017	1 mo	female	－	Morocco	c.469G>A, p.E157K	AD partial	isolated MSMD	Y	Y		Y				M. bovis-BCG					ethambutol, RFP, PZA, and quinolones				Alive
P4 (P3's mother)	K2	Kagawa et al.,2017	young	female	－	Morocco	c.469G>A, p.E157K	AD partial	isolated MSMD								M. tuberculosis									Alive
P5	K3	Kagawa et al.,2017	2 y	male	－	Japan	c.749G>A, p.G250E	AD partial	isolated MSMD		Y						M. tuberculosis					RFP, INH and PZA				Alive
P6 (P5's father)	K3	Kagawa et al.,2017	2 y	male	－	Japan	c.749G>A, p.G250E	AD partial	isolated MSMD	Y	Y		Y				M. tuberculosis					RFP, INH, PZA, clarithromycin, and levofloxacin hydrate				Alive
P7 (P5's grandmother)	K3	Kagawa et al.,2017	teenager	female	－	Japan	c.749G>A, p.G250E	AD partial	isolated MSMD	Y	Y		Y				M. bovis-BCG					RFP, INH, PZA, clarithromycin, and levofloxacin hydrate				Alive
P8 (P5's cousin)	K3	Kagawa et al.,2017	5 mo	male	－	Japan	c.749G>A, p.G250E	AD partial	isolated MSMD	Y	Y	Y	Y				M. bovis-BCG					RFP, INH, and streptomycin				Alive
P9	K4	Bhattad et al.,2021; Taur et al.,2021	6 mo	male	－	India	c.749G>A, p.G250E	AD partial	isolated MSMD	Y	Y		Y				M. bovis-BCG					isoniazid, rifampicin, ethambutol, levofloxacin				Alive
P10 (P9's father)	K4	Bhattad et al.,2021	2.5 y	male	－	India	c.749G>A, p.G250E	AD partial	isolated MSMD	Y	Y		Y				M. tuberculosis				Skin biopsy for lupus, Immunosuppressant therapy no respond					Alive
P11 (P9's grandmother)	K4	Bhattad et al.,2021	38 y(relapse in 48 y and 52 y)	female	－	India	c.749G>A, p.G250E	AD partial	isolated MSMD		Y						M. tuberculosis					Anti-mycobacterium treatment (no details)				Alive
P12	K5	Chapgier et al.,2006	1 y	male	－	Germany	c.958C>G, p.E320Q	AD partial	Syndromic MSMD	Y	Y	Y	Y				M. bovis-BCG		mumps virus, VZV, EBV, measles virus, rubella virus, influenza A virus, adenovirus, and RSV			isoniazid, rifampicin				Alive
P13 (P12's mother)	K5	Chapgier et al.,2006	14 y	female	－	Germany	c.958C>G, p.E320Q	AD partial	Syndromic MSMD				Y				M. bovis-BCG		hepatitis A virus, hepatitis B virus, VZV, EBV, mumps virus, parvovirus B19, paranfluenza virus, adenovirus, RSV, and enterovirus							Alive
P14	K6	Chapgier et al.,2006	2 y	male	－	Germany	c.1389G>T, p.Q463H	AD partial	Syndromic MSMD					Y			M. avium		EBV, RSV, adenovirus, parainfluenza virus (I and III), and influenza virus (A and B)							Alive
P15	K7	Ueki et al.,2017	4 mo	female	－	Japan	c.749G>C, p.G250A	AD partial	isolated MSMD	Y	Y	Y	Y		Y		M. bovis-BCG					isoniazid and rifampicin				Alive
P16	K8	Ying et al.,2019	2 y	male	－	China	c.1132A>G, p.R378G	AD partial	isolated MSMD	Y	Y		Y				M. bovis-BCG				anemia	rifampicin, isoniazid and ethambutol				Alive
P17	K9	Ying et al.,2019	1.5 y	female	－	China	c.1378A>G, p.N460D	AD partial	isolated MSMD	Y	Y		Y				M. bovis-BCG				anemia	rifampicin, isoniazid and ethambutol	Y			Alive
P18	K10	Tsumura et al.,2012	5 mo	female	＋	Saudi Arabia	c.1909A>G, p.K637E	AD partial	isolated MSMD	Y	Y		Y				M. bovis-BCG, M. tuberculosis					isoniazid, rifampicin and ciprofloxacin				Alive
P19	K11	Tsumura et al.,2012	1 mo	male	－	Japan	c.2018A>G, p.K673R	AD partial	isolated MSMD	Y	Y	Y					M. bovis-BCG				Suspected sarcoidosis, worsening after glucocorticoid treatment					Alive
P20 (P19's sister)	K11	Tsumura et al.,2012	1 mo	female	－	Japan	c.2018A>G, p.K673R	AD partial	isolated MSMD				Y				M. bovis-BCG									Alive
P21	K12	Boudjemaa et al.,2017	15 mo	female	－	France	c.1911A>C, p.K637N	AD partial	isolated MSMD		Y						M. bovis-BCG				Misdiagnosed as neuroblastoma, chemotherapy was ineffective	Moxifloxacin, Ethambutol,Isoniazide and Rifampicin	Y			Alive
P22 (P21's twin sister)	K12	Boudjemaa et al.,2017	15 mo	female	－	France	c.1911A>C, p.K637N	AD partial	isolated MSMD		Y						M. bovis-BCG					Moxifloxacin, Ethambutol,Isoniazide and Rifampicin	Y			Alive
P23	K13	Sampaio et al.,2012	1.5 y	male	－	/	c.1961T>A, p.M654K	AD partial	isolated MSMD	Y		Y		Y			M. avium					ethambutol, azithromycin, rifampin, ciprofloxacin and amikacin.	Y			Alive
P24	K14	Hirata et al.,2013	3 y	male	－	Japan	c.2102A>G, p.Y701C	AD partial	isolated MSMD		Y						undefined Mycobacterium species					rifampicin, sulfamethoxazole/trimethoprim and clarithromycin				Alive
P25 (P24's mother)	K14	Hirata et al.,2013	18 y	female	－	Japan	c.2102A>G, p.Y701C	AD partial	isolated MSMD		Y											rifampicin, sulfamethoxazole/trimethoprim and clarithromycin				Alive
P26	K15	Dupuis et al.,2001	childhood	female	－	France	c.2117T>C, p.L706S	AD partial	isolated MSMD	Y							M. bovis-BCG					Anti-mycobacterium treatment (no details)				Alive
P27	K16	Dupuis et al.,2001	6 y	female	－	USA	c.2117T>C, p.L706S	AD partial	isolated MSMD								M. avium									Alive
P28	K17	Zhou et al.,2022	1 y	female	/	/	c.1379A>T, p.N460I	AD partial	isolated MSMD	Y	Y	Y	Y	Y			M. bovis-BCG				bone biopsy: Langerhans cell histiocytosis (LCH).Deterioration after chemotherapy	rifampicin and isoniazid				Alive
P29	K18	Liu et al.,2022	after birth	male	/	China	c.1228A>G, p.K410E	AD partial	isolated MSMD				Y				M. bovis-BCG									Alive
P30 (P29's mother)	K18	Liu et al.,2022	after birth	female	/	China	c.1228A>G, p.K410E	AD partial	isolated MSMD				Y				M. bovis-BCG									Alive
P31	K19	Liu et al.,2022	after birth	female	－	China	c.2071A>G, p.M691V	AD partial	isolated MSMD	Y	Y	Y	Y				M. bovis-BCG									Alive
P32	K20	Muriel-Vizcaino et al.,2016	/	/	/	/	c.208C>T, p.R70C	AR	MSMD												HLH; refractory seizures	ganciclovir, steroids, cyclosporine, and IVIG.
P33	K21	Taur et al.,2021; Le Voyer et al.,2021	6 mo	female	＋	India	c.769dup, p.D257Gfs * 22	AR complete	isolated MSMD	Y	5	14	8	6	10	1	M. bovis-BCG					Anti-mycobacterium treatment (no details)				Dead
P34(P33's sister)	K21	Taur et al.,2021; Le Voyer et al.,2021	3 mo	female	＋	India	c.769dup, p.D257Gfs * 22	AR complete	isolated MSMD	Y							M. bovis-BCG					Anti-mycobacterium treatment (no details)				Dead
P35	K22	Kristensen et al.,2011; Le Voyer et al.,2021	16 y	female	－	Denmark	G5151A, p.A46T(Father); A16034G,truncated STAT1(1-194)K211R(Mother)	AR partial	Syndromic MSMD	Y							M. avium		EBV, CMV and VZV			clarithromycin and rifampicin,etambutol added for the first 2 months				Alive
P36	K23	Le Voyer et al.,2021	10 mo	male	＋	Pakistan	c.372G>C, Q124H	AR complete	Syndromic MSMD								M. kansasii		CMV, EBV, HSV, Enterovirus	Aspergillus fumigatus	septicemia, DIC, epileptic seizure	Anti-mycobacterium treatment (no details); ganciclovir		rituximab (for EBV)	Y (At the age of 4.5)	Alive (aged 15.5 yo, year+11)
P37	K24	Kong et al.,2010; Le Voyer et al.,2021	6 y	male	＋	Saudi Arabia	c.603G>T, p.K201N	AR partial	Syndromic MSMD	Y							M. avium		VZV, CMV, EBV, and Toxoplasma gondii	C. parapsilosis	epileptic seizure	cycloserine, ethionamide, ethambutol, and moxifloxacin.	Y			Alive
P38(P47's sister)	K24	Kong et al.,2010; Le Voyer et al.,2021	2 mo	female	＋	Saudi Arabia	c.603G>T, p.K201N	AR partial	Syndromic MSMD	Y							M. bovis-BCG					Anti-mycobacterium treatment (no details)				died at the age of 3 years, from septic shock.
P39	K25	Dupuis et al.,2003; Le Voyer et al.,2021	3 mo	female	＋	Saudi Arabia	1758–1759delAG, Glu587Alafs*18	AR complete	Syndromic MSMD	Y							M. bovis-BCG		HSV-1			Anti-mycobacterium treatment (no details), antiviral treatments				Dead
P40	K26	Le Voyer et al.,2021	2 mo	female	＋	Saudi Arabia	1758–1759delAG, Glu587Alafs*18	AR complete	Syndromic MSMD								M. abscessus	Corynebacterium spp.a-haemolytic streptococcus				Anti-mycobacterium treatment (no details)			Y	Dead (21 mo, day+96)
P41(P40's sister)	K26	Le Voyer et al.,2021	<1y	female	＋	Saudi Arabia	Not genotyped	suspected AR STAT1 deficiency	isolated MSMD								M. bovis-BCG					Anti-mycobacterium treatment (no details)				died from BCG-osis and sepsis
P42(P40's sister)	K26	Le Voyer et al.,2021	<1y	female	＋	Saudi Arabia	Not genotyped	suspected AR STAT1 deficiency	/																	suspected died from viral infection
P43	K27	Dupuis et al.,2003; Le Voyer et al.,2021	2 mo	female	＋	Saudi Arabia	c.1799 T>C, p.L600P	AR complete	Syndromic MSMD	Y							M. bovis-BCG					Anti-mycobacterium treatment (no details), antiviral treatments				died of a viral-like illness
P44	K27	Le Voyer et al.,2021	3 mo	female	＋	Saudi Arabia	c.1799 T>C, p.L600P	AR complete	Syndromic MSMD								M. bovis-BCG					Anti-mycobacterium treatment (no details)				died from respiratory failure
P45(P44's sister)	K27	Le Voyer et al.,2021	3 mo	female	＋	Saudi Arabia	c.1799 T>C, p.L600P	AR complete	isolated MSMD								M. bovis-BCG					Anti-mycobacterium treatment (no details)				Dead
P46	K28	Chapgier et al.,2006; Le Voyer et al.,2021	3 mo	male	＋	Pakistan	1928ins A, Thr643Asnfs*4	AR complete	Syndromic MSMD	Y							M. bovis-BCG				respiratory distress; severe hepatitis	isoniazid, rifampicin, ethambutol, and ciprofloxacin	Y	infliximab/rituximab	Y	died from fulminant EBV infection several months after HSCT
P47	K29	Chapgier et al.,2006; Averbuch et al.,2011; Le Voyer et al.,2021	2 y	male	＋	Israel	c.2086C>T, p.P696S	AR partial	Syndromic MSMD	Y							M.szulgai	2 episodes of bacteremia (Salmonella,At 2y and 9y)	HSV; molluscum contagiosum; CMV and EBV.		mild asthma;Recurrent otitis media; lobar pneumonia	ceftriaxone; cefixime; ceftriaxone; isoniazid, rifampicin, pyrazinamide, ethambutol; ampicillin; acyclovir; chloramphenicol replaced ceftriaxone;				Alive
P48（P47's sister）	K29	Chapgier et al.,2006; Averbuch et al.,2011; Le Voyer et al.,2021	2 mo	female	＋	Israel	c.2086C>T, p.P696S	AR partial	Syndromic MSMD	Y							undefined Mycobacterium species	Meningitis (Salmonella); Urine (Escherichia coli and Klebsiella pneumoniae);	RSV		Recurrent pneumonia; cellulitis; urinary tract infection; chronic sinusitis; osteomyelitis;aseptic meningitis	clindamycin acyclovir, and cefuroxime;cefixime;azithromycin, rifampin, and ethambutol.				Alive
P49	K30	Le Voyer et al.,2021	8 mo	male	＋	Australia	c.88delA, p.Ile30Serfs*9	AR complete	/										diarrhea, encephalopathy (HHV6 positivity)		HLH				Y	Alive (aged 6 yo, month+62)
P50(P49's sister)	K30	Le Voyer et al.,2021	<1y	female	＋	Australia	c.88delA, p.Ile30Serfs*9	AR complete	/																Y	Alive (aged 4 yo, month+46)
P51	K31	Le Voyer et al.,2021	4 mo	male	＋	Guinea	c.1011_1012delAG; p.Val339ProfsTer18	AR complete	/									Rothia dentocariosa, Streptococcus viridans, Klebsiella pneumoniae	VZV, RSV, rhinovirus, enterovirus, parainfluenzae virus		respiratory failure; HLH; Peritonitis; orchitis; Ventriculitis; Bronchitis; Keratoconjunctivitis			rituximab	Y	Dead(aged 20 mo, day+63); died from respiratory failure
P52	K32	Le Voyer et al.,2021	3 mo	male	＋	Russia	c.541+1G>A/541+1G>A	AR complete	Syndromic MSMD								M. bovis-BCG	Bacillus circulans, Pseudomonas aeruginosa, Staphylococcus aureus		C. parapsilosis		Anti-mycobacterium treatment (no details)				Dead
P53(P52's brother)	K32	Le Voyer et al.,2021	1 mo	male	＋	Russia	c.541+1G>A/541+1G>A	AR complete	/										CMV	C. parapsilosis	HLH				Y	Alive (2 yo, month+19)
P54(P52's brother)	K32	Le Voyer et al.,2021	2 mo	male	＋	Russia	Not genotyped	suspected AR STAT1 deficiency	/																	suspected died from viral infection
P55(P52's brother)	K32	Le Voyer et al.,2021	3 mo	male	＋	Russia	Not genotyped	suspected AR STAT1 deficiency	/																	died from severe pneumonia
P56	K33	Le Voyer et al.,2021	6 mo	male	＋	Turkey	c.541+2dup/541+2dup	AR	isolated MSMD								M. bovis-BCG					Anti-mycobacterium treatment (no details)				Dead
P57	K34	Le Voyer et al.,2021	1 mo	male	＋	Saudi Arabia	p.S62*/S62*	AR complete	Syndromic MSMD								M. scrofulaceum	Klebsiella pneumoniae	CMV, Influenza B, rhinovirus, coronavirus 229E, bocavirus, norovirus, metapneumovirus	C. tropicalis		Anti-mycobacterium treatment (no details)			Y	Alive (4 yo, month+17)
P58	K35	Le Voyer et al.,2021	6 mo	male	－	USA	p.Q9*/E625*	AR complete	Syndromic MSMD								M. kansasii		HHV-6, VZV, RSV, rhinovirus, enterovirus, influenza A	C. parapsilosis, C. albicans, Cryptococcus neoformans	HLH	Anti-mycobacterium treatment (no details)			Y	Dead (22 mo day+78)
P59	K36	Le Voyer et al.,2021	0.1 mo	female	＋	UAE	c.693_696del/693_696del	AR complete	Syndromic MSMD								undefined Mycobacterium species		VZV, RSV		HLH	Anti-mycobacterium treatment (no details)				Dead
P60	K37	Le Voyer et al.,2021	2 mo	female	＋	Palestine	p.E618*/E618*	AR complete	/									Staphylococcus aureus	CMV, HSV-1						Y	Alive (aged 2.6 yo, month+13)
P61	K38	Sakata et al.,2020; Le Voyer et al.,2021	1 mo	male	－	Japan	c.128+2 T>G/c.542-8 A>G	AR complete ;Compound heterozygous	Syndromic MSMD	Y							M. bovis-BCG; M. malmoense	Mycoplasma pneumoniae	VZV, RSV, metapneumovirus, influenza A, rotavirus		HLH; acute asthma	INH, RFP and EMB			Y	Alive (6 yo, month+10)
P62	K39	Le Voyer et al.,2021	5 mo	female	＋	Saudi Arabia	p.L407R/L407R	AR partial	Syndromic MSMD								M. bovis-BCG		Rhinovirus	C. parapsilosis, C. albicans	HLH	Anti-mycobacterium treatment (no details)				Dead
P63(P62's brother)	K39	Le Voyer et al.,2021	2 mo	male	＋	Saudi Arabia	Not genotyped	suspected AR STAT1 deficiency	isolated MSMD								M. bovis-BCG					Anti-mycobacterium treatment (no details)				died from fever, with hepatosplenomegaly and cytopenia
P64	K40	Le Voyer et al.,2021	6 mo	female	＋	Pakistan	p.I648T/I648T	AR partial	Syndromic MSMD								M. avium		CMV			Anti-mycobacterium treatment (no details)			Y	Alive (5 yo, month+19)
Blank indicates not acquired
